# Supplementary material
Source: PubMed Central journal article supplement (PMC4326937)
Supplement: acel0013-0596-sd1.pdf [file acel0013-0596-sd1.pdf]

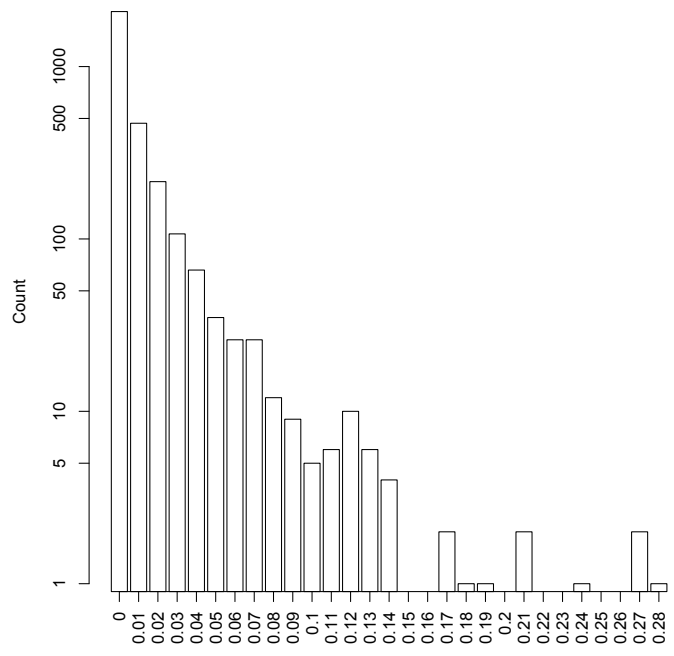

AE Heritability

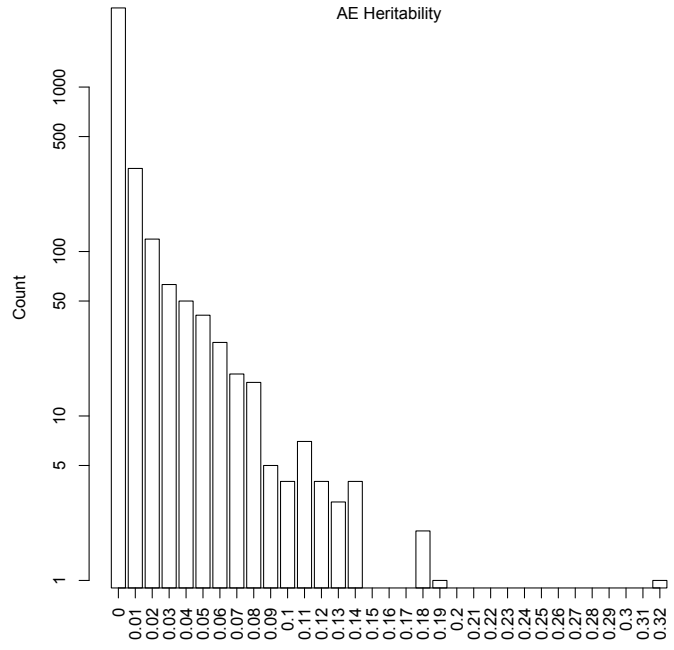

C18 Heritability
