# Supplementary material
Source: PubMed Central journal article supplement (PMC4326937)

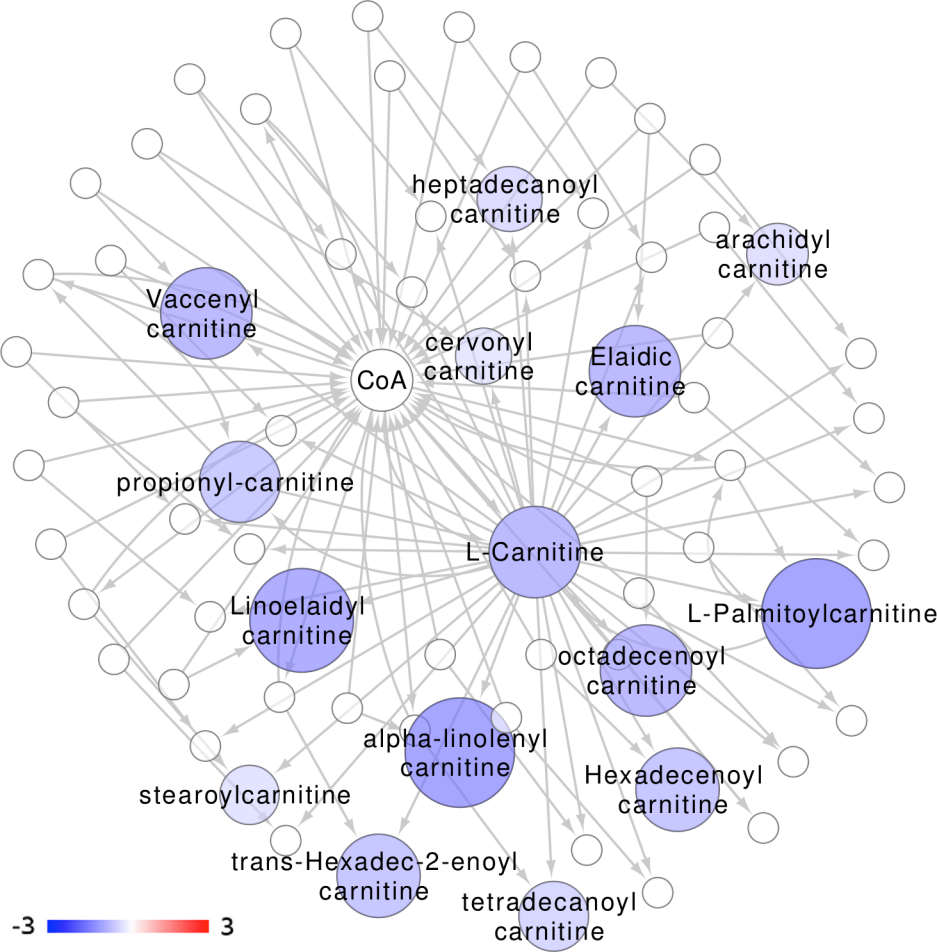

Supplement: acel0013-0596-sd3.pdf [file acel0013-0596-sd3.pdf]
